# Supplementary material
Source: Research Square preprint supplement (doi:10.21203/rs.3.rs-10244248/v1)
Supplement: Supplementary file 1 [file 0caf131ede7310bc2d6890f9.docx]

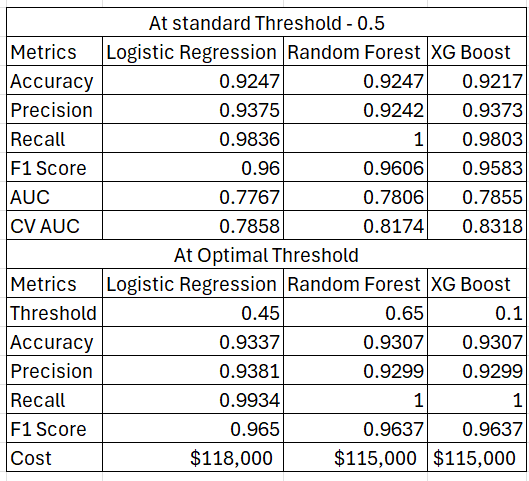


**Table 1. Performance Metric Evaluation at the default threshold of 0.5 and at their respective optimal threshold**

**
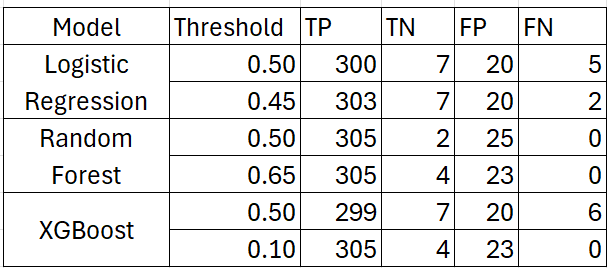
**

**Table 2. Confusion Matrices at the default and Optimal Thresholds**
